# Supplementary figures and images for: In-syringe chitosan-assisted dispersive micro-solid phase extraction for the determination of anthraquinones in rhubarb-based oral liquids using high performance liquid chromatography
Source: Royal Society of Chemistry journal article supplement (doi:10.1039/c7ay01525a), 2017-01-01

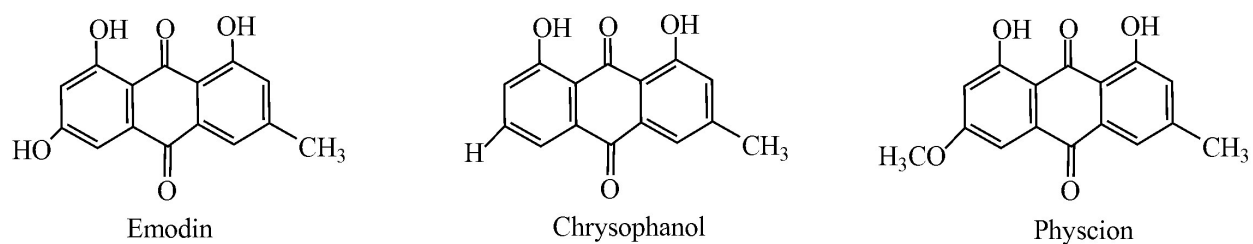

Fig. S1

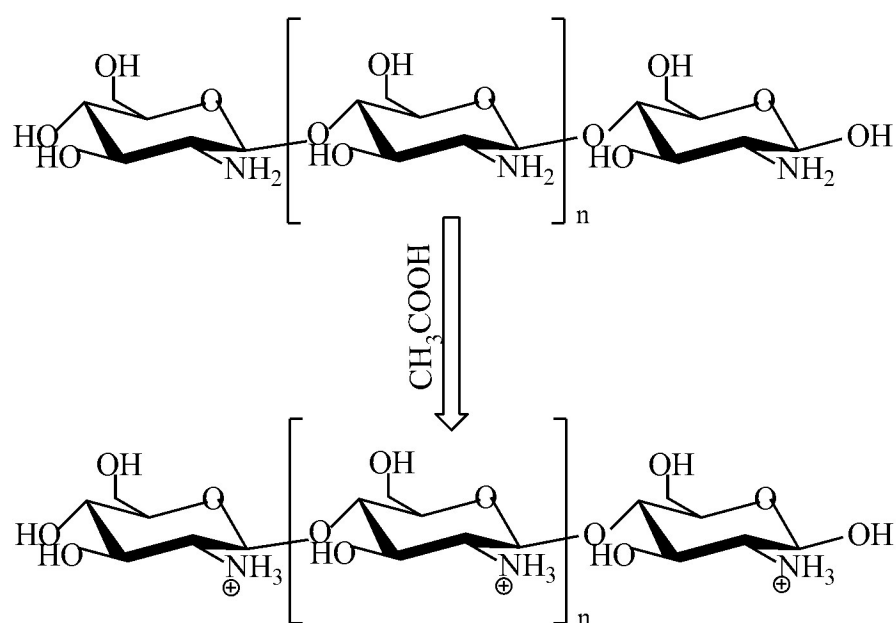

Fig. S2

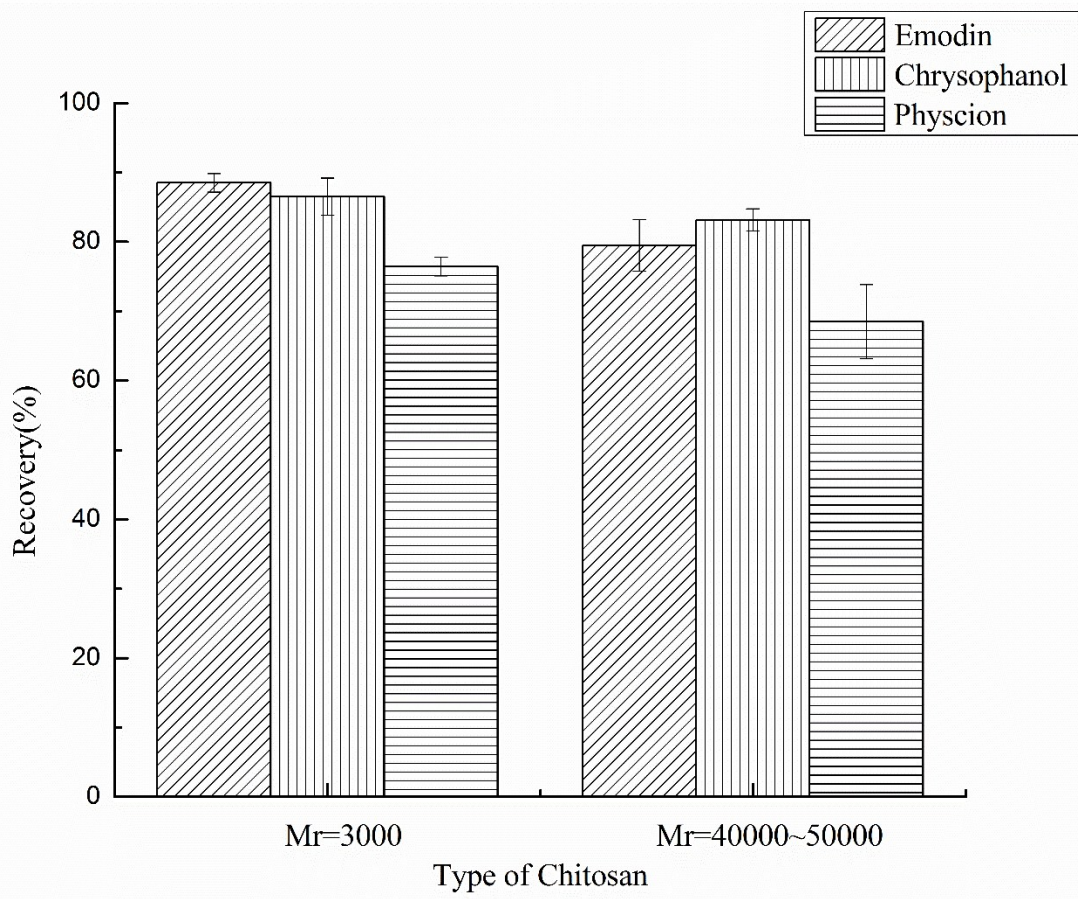

Fig.S3

Supplement: c7ay01525a1.pdf [file c7ay01525a1.pdf]
